# Supplementary material for: Effects of robotic guidance on the coordination of locomotion
Source: Springer Nature journal article supplement (doi:10.1186/1743-0003-10-79), 2013-01-01
Supplement: 12984_2012_494_MOESM1_ESM.pdf [file 12984_2012_494_MOESM1_ESM.pdf]

Table 1 - Evaluation of Module 1. 'Tr.' represents treadmill walking and 'Lo.' represents robotic-guided walking. (A) Correlation of Activation signal 1 among all the conditions of guidance force and speed in the average group. (B) Correlation of Module 1 among all the conditions of guidance force and speed in the average group.

A) Activation signal 1

|                               |       |        |       |      |        |        |        |        |        |        |        |        |        |       |   |  |  |  |  |  |  |
|-------------------------------|-------|--------|-------|------|--------|--------|--------|--------|--------|--------|--------|--------|--------|-------|---|--|--|--|--|--|--|
| Tr. 1.5 Km/h speed            | 1     |        |       |      |        |        |        |        |        |        |        |        |        |       |   |  |  |  |  |  |  |
| Tr. 2.0 Km/h speed            | ,494  | 1      |       |      |        |        |        |        |        |        |        |        |        |       |   |  |  |  |  |  |  |
| Tr. 2.5 Km/h speed            | ,733  | ,850*  | 1     |      |        |        |        |        |        |        |        |        |        |       |   |  |  |  |  |  |  |
| Lo. 1.5 Km/h speed<br>20% GF  | ,550  | -,034  | ,030  | 1    |        |        |        |        |        |        |        |        |        |       |   |  |  |  |  |  |  |
| Lo. 2.0 Km/h speed<br>20% GF  | ,636  | ,886** | ,730  | ,364 | 1      |        |        |        |        |        |        |        |        |       |   |  |  |  |  |  |  |
| Lo. 2.5 Km/h speed<br>20% GF  | ,571  | ,872*  | ,685  | ,161 | ,949** | 1      |        |        |        |        |        |        |        |       |   |  |  |  |  |  |  |
| Lo. 1.5 Km/h speed<br>40% GF  | ,762* | ,764*  | ,656  | ,571 | ,957** | ,879** | 1      |        |        |        |        |        |        |       |   |  |  |  |  |  |  |
| Lo. 2.0 Km/h speed<br>40% GF  | ,857* | ,834*  | ,849* | ,361 | ,922** | ,892** | ,934** | 1      |        |        |        |        |        |       |   |  |  |  |  |  |  |
| Lo. 2.5 Km/h speed<br>40% GF  | ,818* | ,861*  | ,845* | ,247 | ,900** | ,906** | ,901** | ,988** | 1      |        |        |        |        |       |   |  |  |  |  |  |  |
| Lo. 1.5 Km/h speed<br>70% GF  | ,752  | ,800*  | ,756* | ,447 | ,959** | ,895** | ,956** | ,958** | ,921** | 1      |        |        |        |       |   |  |  |  |  |  |  |
| Lo. 2.0 Km/h speed<br>70% GF  | ,758* | ,869*  | ,848* | ,247 | ,928** | ,913** | ,900** | ,979** | ,974** | ,967** | 1      |        |        |       |   |  |  |  |  |  |  |
| Lo. 2.5 Km/h speed<br>70% GF  | ,727  | ,920** | ,846* | ,197 | ,944** | ,942** | ,905** | ,974** | ,985** | ,942** | ,987** | 1      |        |       |   |  |  |  |  |  |  |
| Lo. 1.5 Km/h speed<br>100% GF | ,723  | ,897** | ,779* | ,290 | ,971** | ,965** | ,948** | ,967** | ,971** | ,941** | ,958** | ,984** | 1      |       |   |  |  |  |  |  |  |
| Lo. 2.0 Km/h speed<br>100% GF | ,682  | ,835*  | ,812* | ,278 | ,897** | ,828*  | ,866*  | ,920** | ,902** | ,957** | ,968** | ,935** | ,887** | 1     |   |  |  |  |  |  |  |
| Lo. 2.5 Km/h speed<br>100% GF | ,797* | ,869*  | ,807* | ,264 | ,899** | ,902** | ,908** | ,965** | ,985** | ,882** | ,932** | ,966** | ,974** | ,842* | 1 |  |  |  |  |  |  |
| Tr. 1.5 Km/h speed            |       |        |       |      |        |        |        |        |        |        |        |        |        |       |   |  |  |  |  |  |  |
| Tr. 2.0 Km/h speed            |       |        |       |      |        |        |        |        |        |        |        |        |        |       |   |  |  |  |  |  |  |
| Tr. 2.5 Km/h speed            |       |        |       |      |        |        |        |        |        |        |        |        |        |       |   |  |  |  |  |  |  |
| Lo. 1.5 Km/h speed 20%<br>GF  |       |        |       |      |        |        |        |        |        |        |        |        |        |       |   |  |  |  |  |  |  |
| Lo. 2.0 Km/h speed 20%<br>GF  |       |        |       |      |        |        |        |        |        |        |        |        |        |       |   |  |  |  |  |  |  |
| Lo. 2.5 Km/h speed 20%<br>GF  |       |        |       |      |        |        |        |        |        |        |        |        |        |       |   |  |  |  |  |  |  |
| Lo. 1.5 Km/h speed 40%<br>GF  |       |        |       |      |        |        |        |        |        |        |        |        |        |       |   |  |  |  |  |  |  |
| Lo. 2.0 Km/h speed 40%<br>GF  |       |        |       |      |        |        |        |        |        |        |        |        |        |       |   |  |  |  |  |  |  |
| Lo. 2.5 Km/h speed 40%<br>GF  |       |        |       |      |        |        |        |        |        |        |        |        |        |       |   |  |  |  |  |  |  |
| Lo. 1.5 Km/h speed 70%<br>GF  |       |        |       |      |        |        |        |        |        |        |        |        |        |       |   |  |  |  |  |  |  |
| Lo. 2.0 Km/h speed 70%<br>GF  |       |        |       |      |        |        |        |        |        |        |        |        |        |       |   |  |  |  |  |  |  |
| Lo. 2.5 Km/h speed 70%<br>GF  |       |        |       |      |        |        |        |        |        |        |        |        |        |       |   |  |  |  |  |  |  |
| Lo. 1.5 Km/h speed 100%<br>GF |       |        |       |      |        |        |        |        |        |        |        |        |        |       |   |  |  |  |  |  |  |
| Lo. 2.0 Km/h speed 100%<br>GF |       |        |       |      |        |        |        |        |        |        |        |        |        |       |   |  |  |  |  |  |  |
| Lo. 2.5 Km/h speed 100%<br>GF |       |        |       |      |        |        |        |        |        |        |        |        |        |       |   |  |  |  |  |  |  |

\* Correlation is significant at the 0.05 level (2-tailed).  
 \*\* Correlation is significant at the 0.01 level (2-tailed).

B) Module 1

Tr. 1.5 Km/h speed 1

|                               |                    |                    |                    |                    |                    |                    |                    |                    |                    |                    |                    |                    |                    |                   |   |  |  |  |  |  |
|-------------------------------|--------------------|--------------------|--------------------|--------------------|--------------------|--------------------|--------------------|--------------------|--------------------|--------------------|--------------------|--------------------|--------------------|-------------------|---|--|--|--|--|--|
| Tr. 2.0 Km/h speed            | ,889 <sup>**</sup> | 1                  |                    |                    |                    |                    |                    |                    |                    |                    |                    |                    |                    |                   |   |  |  |  |  |  |
| Tr. 2.5 Km/h speed            | ,759 <sup>*</sup>  | ,902 <sup>**</sup> | 1                  |                    |                    |                    |                    |                    |                    |                    |                    |                    |                    |                   |   |  |  |  |  |  |
| Lo. 1.5 Km/h speed<br>20% GF  | ,899 <sup>**</sup> | ,827 <sup>*</sup>  | ,873 <sup>*</sup>  | 1                  |                    |                    |                    |                    |                    |                    |                    |                    |                    |                   |   |  |  |  |  |  |
| Lo. 2.0 Km/h speed<br>20% GF  | ,993 <sup>**</sup> | ,895 <sup>**</sup> | ,738               | ,865 <sup>*</sup>  | 1                  |                    |                    |                    |                    |                    |                    |                    |                    |                   |   |  |  |  |  |  |
| Lo. 2.5 Km/h speed<br>20% GF  | ,980 <sup>**</sup> | ,916 <sup>**</sup> | ,765 <sup>*</sup>  | ,854 <sup>*</sup>  | ,995 <sup>**</sup> | 1                  |                    |                    |                    |                    |                    |                    |                    |                   |   |  |  |  |  |  |
| Lo. 1.5 Km/h speed<br>40% GF  | ,974 <sup>**</sup> | ,872 <sup>*</sup>  | ,699               | ,818 <sup>*</sup>  | ,991 <sup>**</sup> | ,991 <sup>**</sup> | 1                  |                    |                    |                    |                    |                    |                    |                   |   |  |  |  |  |  |
| Lo. 2.0 Km/h speed<br>40% GF  | ,909 <sup>**</sup> | ,818 <sup>*</sup>  | ,820 <sup>*</sup>  | ,895 <sup>**</sup> | ,883 <sup>**</sup> | ,871 <sup>*</sup>  | ,878 <sup>**</sup> | 1                  |                    |                    |                    |                    |                    |                   |   |  |  |  |  |  |
| Lo. 2.5 Km/h speed<br>40% GF  | ,972 <sup>**</sup> | ,876 <sup>**</sup> | ,838 <sup>*</sup>  | ,953 <sup>**</sup> | ,950 <sup>**</sup> | ,937 <sup>**</sup> | ,928 <sup>**</sup> | ,972 <sup>**</sup> | 1                  |                    |                    |                    |                    |                   |   |  |  |  |  |  |
| Lo. 1.5 Km/h speed<br>70% GF  | ,957 <sup>**</sup> | ,898 <sup>**</sup> | ,873 <sup>*</sup>  | ,969 <sup>**</sup> | ,946 <sup>**</sup> | ,945 <sup>**</sup> | ,925 <sup>**</sup> | ,941 <sup>**</sup> | ,986 <sup>**</sup> | 1                  |                    |                    |                    |                   |   |  |  |  |  |  |
| Lo. 2.0 Km/h speed<br>70% GF  | ,967 <sup>**</sup> | ,895 <sup>**</sup> | ,783 <sup>*</sup>  | ,896 <sup>**</sup> | ,979 <sup>**</sup> | ,984 <sup>**</sup> | ,978 <sup>**</sup> | ,893 <sup>**</sup> | ,951 <sup>**</sup> | ,972 <sup>**</sup> | 1                  |                    |                    |                   |   |  |  |  |  |  |
| Lo. 2.5 Km/h speed<br>70% GF  | ,973 <sup>**</sup> | ,895 <sup>**</sup> | ,852 <sup>*</sup>  | ,955 <sup>**</sup> | ,961 <sup>**</sup> | ,956 <sup>**</sup> | ,943 <sup>**</sup> | ,958 <sup>**</sup> | ,995 <sup>**</sup> | ,996 <sup>**</sup> | ,973 <sup>**</sup> | 1                  |                    |                   |   |  |  |  |  |  |
| Lo. 1.5 Km/h speed<br>100% GF | ,992 <sup>**</sup> | ,847 <sup>*</sup>  | ,710               | ,875 <sup>**</sup> | ,977 <sup>**</sup> | ,953 <sup>**</sup> | ,955 <sup>**</sup> | ,909 <sup>**</sup> | ,963 <sup>**</sup> | ,929 <sup>**</sup> | ,933 <sup>**</sup> | ,953 <sup>**</sup> | 1                  |                   |   |  |  |  |  |  |
| Lo. 2.0 Km/h speed<br>100% GF | ,854 <sup>*</sup>  | ,599               | ,578               | ,896 <sup>**</sup> | ,808 <sup>*</sup>  | ,758 <sup>*</sup>  | ,760 <sup>*</sup>  | ,798 <sup>*</sup>  | ,872 <sup>*</sup>  | ,846 <sup>*</sup>  | ,795 <sup>*</sup>  | ,852 <sup>*</sup>  | ,871 <sup>*</sup>  | 1                 |   |  |  |  |  |  |
| Lo. 2.5 Km/h speed<br>100% GF | ,972 <sup>**</sup> | ,915 <sup>**</sup> | ,875 <sup>**</sup> | ,948 <sup>**</sup> | ,959 <sup>**</sup> | ,957 <sup>**</sup> | ,938 <sup>**</sup> | ,956 <sup>**</sup> | ,992 <sup>**</sup> | ,990 <sup>**</sup> | ,963 <sup>**</sup> | ,996 <sup>**</sup> | ,953 <sup>**</sup> | ,825 <sup>*</sup> | 1 |  |  |  |  |  |
| Tr. 1.5 Km/h speed            |                    |                    |                    |                    |                    |                    |                    |                    |                    |                    |                    |                    |                    |                   |   |  |  |  |  |  |
| Tr. 2.0 Km/h speed            |                    |                    |                    |                    |                    |                    |                    |                    |                    |                    |                    |                    |                    |                   |   |  |  |  |  |  |
| Tr. 2.5 Km/h speed            |                    |                    |                    |                    |                    |                    |                    |                    |                    |                    |                    |                    |                    |                   |   |  |  |  |  |  |
| Lo. 1.5 Km/h speed 20%<br>GF  |                    |                    |                    |                    |                    |                    |                    |                    |                    |                    |                    |                    |                    |                   |   |  |  |  |  |  |
| Lo. 2.0 Km/h speed 20%<br>GF  |                    |                    |                    |                    |                    |                    |                    |                    |                    |                    |                    |                    |                    |                   |   |  |  |  |  |  |
| Lo. 2.5 Km/h speed 20%<br>GF  |                    |                    |                    |                    |                    |                    |                    |                    |                    |                    |                    |                    |                    |                   |   |  |  |  |  |  |
| Lo. 1.5 Km/h speed 40%<br>GF  |                    |                    |                    |                    |                    |                    |                    |                    |                    |                    |                    |                    |                    |                   |   |  |  |  |  |  |
| Lo. 2.0 Km/h speed 40%<br>GF  |                    |                    |                    |                    |                    |                    |                    |                    |                    |                    |                    |                    |                    |                   |   |  |  |  |  |  |
| Lo. 2.5 Km/h speed 40%<br>GF  |                    |                    |                    |                    |                    |                    |                    |                    |                    |                    |                    |                    |                    |                   |   |  |  |  |  |  |
| Lo. 1.5 Km/h speed 70%<br>GF  |                    |                    |                    |                    |                    |                    |                    |                    |                    |                    |                    |                    |                    |                   |   |  |  |  |  |  |
| Lo. 2.0 Km/h speed 70%<br>GF  |                    |                    |                    |                    |                    |                    |                    |                    |                    |                    |                    |                    |                    |                   |   |  |  |  |  |  |
| Lo. 2.5 Km/h speed 70%<br>GF  |                    |                    |                    |                    |                    |                    |                    |                    |                    |                    |                    |                    |                    |                   |   |  |  |  |  |  |
| Lo. 1.5 Km/h speed 100%<br>GF |                    |                    |                    |                    |                    |                    |                    |                    |                    |                    |                    |                    |                    |                   |   |  |  |  |  |  |
| Lo. 2.0 Km/h speed 100%<br>GF |                    |                    |                    |                    |                    |                    |                    |                    |                    |                    |                    |                    |                    |                   |   |  |  |  |  |  |
| Lo. 2.5 Km/h speed 100%<br>GF |                    |                    |                    |                    |                    |                    |                    |                    |                    |                    |                    |                    |                    |                   |   |  |  |  |  |  |

\* Correlation is significant at the 0.05 level (2-tailed).

\*\* Correlation is significant at the 0.01 level (2-tailed).

Table 2 - Evaluation of Module 2. ‘Tr.’ represents treadmill walking and ‘Lo.’ represents robotic-guided walking. (A) Correlation of Activation signal 2 among all the conditions of guidance force and speed in the average group. (B) Correlation of Module 2 among all the conditions of guidance force and speed in the average group.

#### A) Activation signal 2

|                    |                     |
|--------------------|---------------------|
| Tr. 1.5 Km/h speed | 1                   |
| Tr. 2.0 Km/h speed | ,851 <sup>*</sup> 1 |





|                            | Tr. 1.5 Km/h speed | Tr. 2.0 Km/h speed | Tr. 2.5 Km/h speed | .o. 1.5 Km/h speed 20% GF | .o. 2.0 Km/h speed 20% GF | Lo. 2.5 Km/h speed 20% GF | Lo. 1.5 Km/h speed 40% GF | Lo. 2.0 Km/h speed 40% GF | .o. 2.5 Km/h speed 40% GF | .o. 1.5 Km/h speed 70% GF | .o. 2.0 Km/h speed 70% GF | Lo. 2.5 Km/h speed 70% GF | .o. 1.5 Km/h speed 100% GF | .o. 2.0 Km/h speed 100% GF | Lo. 2.5 Km/h speed 100% GF |
|----------------------------|--------------------|--------------------|--------------------|---------------------------|---------------------------|---------------------------|---------------------------|---------------------------|---------------------------|---------------------------|---------------------------|---------------------------|----------------------------|----------------------------|----------------------------|
| <b>40% GF</b>              |                    |                    |                    |                           |                           |                           |                           |                           |                           |                           |                           |                           |                            |                            |                            |
| Lo. 2.5 Km/h speed 40% GF  |                    |                    |                    |                           |                           |                           |                           |                           |                           |                           |                           |                           |                            |                            |                            |
| Lo. 1.5 Km/h speed 70% GF  |                    |                    |                    |                           |                           |                           |                           |                           |                           |                           |                           |                           |                            |                            |                            |
| Lo. 2.0 Km/h speed 70% GF  |                    |                    |                    |                           |                           |                           |                           |                           |                           |                           |                           |                           |                            |                            |                            |
| Lo. 2.5 Km/h speed 70% GF  |                    |                    |                    |                           |                           |                           |                           |                           |                           |                           |                           |                           |                            |                            |                            |
| Lo. 1.5 Km/h speed 100% GF |                    |                    |                    |                           |                           |                           |                           |                           |                           |                           |                           |                           |                            |                            |                            |
| Lo. 2.0 Km/h speed 100% GF |                    |                    |                    |                           |                           |                           |                           |                           |                           |                           |                           |                           |                            |                            |                            |
| Lo. 2.5 Km/h speed 100% GF |                    |                    |                    |                           |                           |                           |                           |                           |                           |                           |                           |                           |                            |                            |                            |

\* Correlation is significant at the 0.05 level (2-tailed).  
 \*\* Correlation is significant at the 0.01 level (2-tailed).

### B) Module 3

|                           |                                                                         |
|---------------------------|-------------------------------------------------------------------------|
| Tr. 1.5 Km/h speed        | 1                                                                       |
| Tr. 2.0 Km/h speed        | ,970** 1                                                                |
| Tr. 2.5 Km/h speed        | ,931** ,984** 1                                                         |
| Lo. 1.5 Km/h speed 20% GF | ,929** ,980** ,972** 1                                                  |
| Lo. 2.0 Km/h speed 20% GF | ,999** ,977** ,939** ,935** 1                                           |
| Lo. 2.5 Km/h speed 20% GF | ,990** ,952** ,906** ,906** ,988** 1                                    |
| Lo. 1.5 Km/h speed 40% GF | ,996** ,962** ,911** ,913** ,997** ,984** 1                             |
| Lo. 2.0 Km/h speed 40% GF | ,965** ,993** ,982** ,974** ,973** ,938** ,957** 1                      |
| Lo. 2.5 Km/h speed 40% GF | ,963** ,984** ,979** ,973** ,968** ,930** ,951** ,996** 1               |
| Lo. 1.5 Km/h speed 70% GF | ,960** ,991** ,988** ,988** ,965** ,939** ,943** ,993** ,993** 1        |
| Lo. 2.0 Km/h speed 70% GF | ,970** ,986** ,976** ,983** ,973** ,947** ,955** ,992** ,995** ,997** 1 |

|                               |                    |                    |                    |                           |                           |                           |                           |                           |                           |                           |                           |                           |                            |                            |                            |
|-------------------------------|--------------------|--------------------|--------------------|---------------------------|---------------------------|---------------------------|---------------------------|---------------------------|---------------------------|---------------------------|---------------------------|---------------------------|----------------------------|----------------------------|----------------------------|
| Lo. 2.5 Km/h speed<br>70% GF  | ,965**             | ,990**             | ,982**             | ,983**                    | ,971**                    | ,939**                    | ,952**                    | ,997**                    | ,998**                    | ,998**                    | ,998**                    | 1                         |                            |                            |                            |
| Lo. 1.5 Km/h speed<br>100% GF | ,984**             | ,990**             | ,970**             | ,972**                    | ,988**                    | ,963**                    | ,975**                    | ,994**                    | ,994**                    | ,992**                    | ,997**                    | ,996**                    | 1                          |                            |                            |
| Lo. 2.0 Km/h speed<br>100% GF | ,980**             | ,935**             | ,912**             | ,873*                     | ,974**                    | ,966**                    | ,971**                    | ,928**                    | ,931**                    | ,923**                    | ,934**                    | ,926**                    | ,951**                     | 1                          |                            |
| Lo. 2.5 Km/h speed<br>100% GF | ,960**             | ,989**             | ,988**             | ,981**                    | ,965**                    | ,931**                    | ,944**                    | ,996**                    | ,998**                    | ,998**                    | ,997**                    | ,999**                    | ,993**                     | ,928**                     | 1                          |
|                               | Tr. 1.5 Km/h speed | Tr. 2.0 Km/h speed | Tr. 2.5 Km/h speed | Lo. 1.5 Km/h speed 20% GF | Lo. 2.0 Km/h speed 20% GF | Lo. 2.5 Km/h speed 20% GF | Lo. 1.5 Km/h speed 40% GF | Lo. 2.0 Km/h speed 40% GF | Lo. 2.5 Km/h speed 40% GF | Lo. 1.5 Km/h speed 70% GF | Lo. 2.0 Km/h speed 70% GF | Lo. 2.5 Km/h speed 70% GF | Lo. 1.5 Km/h speed 100% GF | Lo. 2.0 Km/h speed 100% GF | Lo. 2.5 Km/h speed 100% GF |

\* Correlation is significant at the 0.05 level (2-tailed).

\*\* Correlation is significant at the 0.01 level (2-tailed).

Table 4 - Evaluation of Module 4. ‘Tr.’ represents treadmill walking and ‘Lo.’ represents robotic-guided walking. (A) Correlation of Activation signal 4 among all the conditions of guidance force and speed in the average group. (B) Correlation of Module 4 among all the conditions of guidance force and speed in the average group..

#### A) Activation signal 4

|                              |        |        |       |       |      |        |       |        |        |        |        |        |   |  |  |  |
|------------------------------|--------|--------|-------|-------|------|--------|-------|--------|--------|--------|--------|--------|---|--|--|--|
| Tr. 1.5 Km/h speed           | 1      |        |       |       |      |        |       |        |        |        |        |        |   |  |  |  |
| Tr. 2.0 Km/h speed           | ,941** | 1      |       |       |      |        |       |        |        |        |        |        |   |  |  |  |
| Tr. 2.5 Km/h speed           | ,846*  | ,881** | 1     |       |      |        |       |        |        |        |        |        |   |  |  |  |
| Lo. 1.5 Km/h speed<br>20% GF | ,413   | ,557   | ,310  | 1     |      |        |       |        |        |        |        |        |   |  |  |  |
| Lo. 2.0 Km/h speed<br>20% GF | ,741   | ,914** | ,869* | ,555  | 1    |        |       |        |        |        |        |        |   |  |  |  |
| Lo. 2.5 Km/h speed<br>20% GF | ,306   | ,418   | ,734  | -,125 | ,633 | 1      |       |        |        |        |        |        |   |  |  |  |
| Lo. 1.5 Km/h speed<br>40% GF | ,784*  | ,797*  | ,631  | ,526  | ,714 | ,289   | 1     |        |        |        |        |        |   |  |  |  |
| Lo. 2.0 Km/h speed<br>40% GF | ,233   | ,133   | ,543  | -,509 | ,186 | ,792*  | ,112  | 1      |        |        |        |        |   |  |  |  |
| Lo. 2.5 Km/h speed<br>40% GF | ,285   | ,331   | ,725  | -,182 | ,493 | ,948** | ,132  | ,867*  | 1      |        |        |        |   |  |  |  |
| Lo. 1.5 Km/h speed<br>70% GF | ,061   | -,049  | ,401  | -,569 | ,021 | ,715   | -,063 | ,977** | ,830*  | 1      |        |        |   |  |  |  |
| Lo. 2.0 Km/h speed<br>70% GF | ,286   | ,263   | ,668  | -,351 | ,374 | ,912** | ,157  | ,964** | ,966** | ,924** | 1      |        |   |  |  |  |
| Lo. 2.5 Km/h speed<br>70% GF | ,359   | ,385   | ,755* | -,206 | ,519 | ,957** | ,238  | ,897** | ,987** | ,836*  | ,981** | 1      |   |  |  |  |
| Lo. 1.5 Km/h speed           | ,068   | -,006  | ,450  | -,515 | ,095 | ,784*  | -,055 | ,971** | ,892** | ,985** | ,957** | ,895** | 1 |  |  |  |

|                                       |                           |                           |                           |                                  |                                  |                                  |                                  |                                  |                                  |                                  |                                  |                                  |                                   |                                   |                                   |
|---------------------------------------|---------------------------|---------------------------|---------------------------|----------------------------------|----------------------------------|----------------------------------|----------------------------------|----------------------------------|----------------------------------|----------------------------------|----------------------------------|----------------------------------|-----------------------------------|-----------------------------------|-----------------------------------|
|                                       | <b>100% GF</b>            |                           |                           |                                  |                                  |                                  |                                  |                                  |                                  |                                  |                                  |                                  |                                   |                                   |                                   |
| <b>Lo. 2.0 Km/h speed<br/>100% GF</b> | ,108                      | ,088                      | ,533                      | -,432                            | ,206                             | ,788*                            | -,200                            | ,869*                            | ,921**                           | ,887**                           | ,913**                           | ,882**                           | ,919**                            | 1                                 |                                   |
| <b>Lo. 2.5 Km/h speed<br/>100% GF</b> | ,397                      | ,362                      | ,750                      | -,240                            | ,429                             | ,879**                           | ,192                             | ,927**                           | ,968**                           | ,880**                           | ,981**                           | ,978**                           | ,923**                            | ,912**                            | 1                                 |
|                                       | <b>Tr. 1.5 Km/h speed</b> | <b>Tr. 2.0 Km/h speed</b> | <b>Tr. 2.5 Km/h speed</b> | <b>Lo. 1.5 Km/h speed 20% GF</b> | <b>Lo. 2.0 Km/h speed 20% GF</b> | <b>Lo. 2.5 Km/h speed 20% GF</b> | <b>Lo. 1.5 Km/h speed 40% GF</b> | <b>Lo. 2.0 Km/h speed 40% GF</b> | <b>Lo. 2.5 Km/h speed 40% GF</b> | <b>Lo. 1.5 Km/h speed 70% GF</b> | <b>Lo. 2.0 Km/h speed 70% GF</b> | <b>Lo. 2.5 Km/h speed 70% GF</b> | <b>Lo. 1.5 Km/h speed 100% GF</b> | <b>Lo. 2.0 Km/h speed 100% GF</b> | <b>Lo. 2.5 Km/h speed 100% GF</b> |

\* Correlation is significant at the 0.05 level (2-tailed).  
\*\* Correlation is significant at the 0.01 level (2-tailed).

### B) Module 4

|                                       |        |        |        |      |       |        |       |        |        |        |        |        |        |       |   |
|---------------------------------------|--------|--------|--------|------|-------|--------|-------|--------|--------|--------|--------|--------|--------|-------|---|
| <b>Tr. 1.5 Km/h speed</b>             | 1      |        |        |      |       |        |       |        |        |        |        |        |        |       |   |
| <b>Tr. 2.0 Km/h speed</b>             | ,941** | 1      |        |      |       |        |       |        |        |        |        |        |        |       |   |
| <b>Tr. 2.5 Km/h speed</b>             | ,620   | ,726   | 1      |      |       |        |       |        |        |        |        |        |        |       |   |
| <b>Lo. 1.5 Km/h speed<br/>20% GF</b>  | ,831*  | ,635   | ,463   | 1    |       |        |       |        |        |        |        |        |        |       |   |
| <b>Lo. 2.0 Km/h speed<br/>20% GF</b>  | ,673   | ,723   | ,623   | ,616 | 1     |        |       |        |        |        |        |        |        |       |   |
| <b>Lo. 2.5 Km/h speed<br/>20% GF</b>  | ,683   | ,771*  | ,889** | ,537 | ,874* | 1      |       |        |        |        |        |        |        |       |   |
| <b>Lo. 1.5 Km/h speed<br/>40% GF</b>  | ,920** | ,915** | ,430   | ,649 | ,719  | ,623   | 1     |        |        |        |        |        |        |       |   |
| <b>Lo. 2.0 Km/h speed<br/>40% GF</b>  | ,625   | ,726   | ,989** | ,491 | ,624  | ,873*  | ,425  | 1      |        |        |        |        |        |       |   |
| <b>Lo. 2.5 Km/h speed<br/>40% GF</b>  | ,622   | ,724   | ,969** | ,437 | ,673  | ,945** | ,483  | ,948** | 1      |        |        |        |        |       |   |
| <b>Lo. 1.5 Km/h speed<br/>70% GF</b>  | ,705   | ,754   | ,949** | ,529 | ,609  | ,891** | ,530  | ,907** | ,965** | 1      |        |        |        |       |   |
| <b>Lo. 2.0 Km/h speed<br/>70% GF</b>  | ,778*  | ,786*  | ,873*  | ,623 | ,702  | ,918** | ,648  | ,831*  | ,932** | ,970** | 1      |        |        |       |   |
| <b>Lo. 2.5 Km/h speed<br/>70% GF</b>  | ,661   | ,714   | ,962** | ,519 | ,626  | ,912** | ,478  | ,930** | ,983** | ,992** | ,962** | 1      |        |       |   |
| <b>Lo. 1.5 Km/h speed<br/>100% GF</b> | ,882** | ,934** | ,849*  | ,692 | ,792* | ,852*  | ,784* | ,832*  | ,812*  | ,853*  | ,852*  | ,823*  | 1      |       |   |
| <b>Lo. 2.0 Km/h speed<br/>100% GF</b> | ,635   | ,757*  | ,769*  | ,220 | ,345  | ,661   | ,562  | ,705   | ,790*  | ,854*  | ,800*  | ,803*  | ,733   | 1     |   |
| <b>Lo. 2.5 Km/h speed<br/>100% GF</b> | ,754   | ,828*  | ,979** | ,580 | ,703  | ,921** | ,589  | ,961** | ,964** | ,972** | ,933** | ,969** | ,926** | ,805* | 1 |

Tr. 1.5 Km/h speed

Tr. 2.0 Km/h speed

Tr. 2.5 Km/h speed

Lo. 1.5 Km/h speed 20% GF

Lo. 2.0 Km/h speed 20% GF

Lo. 2.5 Km/h speed 20% GF

Lo. 1.5 Km/h speed 40% GF

Lo. 2.0 Km/h speed 40% GF

Lo. 2.5 Km/h speed 40% GF

Lo. 1.5 Km/h speed 70% GF

Lo. 2.0 Km/h speed 70% GF

Lo. 2.5 Km/h speed 70% GF

Lo. 1.5 Km/h speed 100% GF

Lo. 2.0 Km/h speed 100% GF

Lo. 2.5 Km/h speed 100% GF

\* Correlation is significant at the 0.05 level (2-tailed).

\*\* Correlation is significant at the 0.01 level (2-tailed).
