# Supplementary material for: Effects of robotic guidance on the coordination of locomotion
Source: Springer Nature journal article supplement (doi:10.1186/1743-0003-10-79), 2013-01-01
Supplement: 12984_2012_494_MOESM4_ESM.pdf [file 12984_2012_494_MOESM4_ESM.pdf]

Hip force

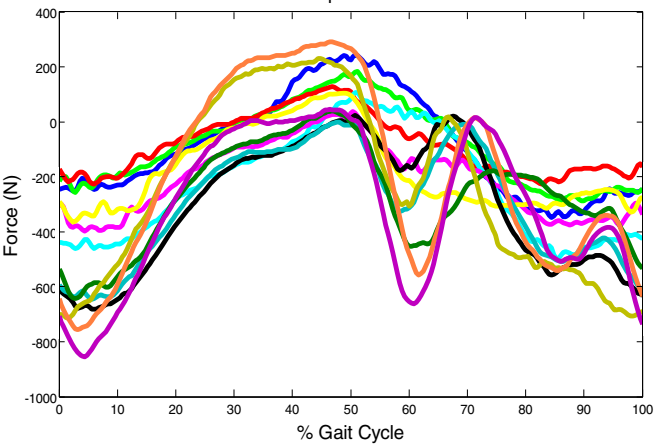

Knee force

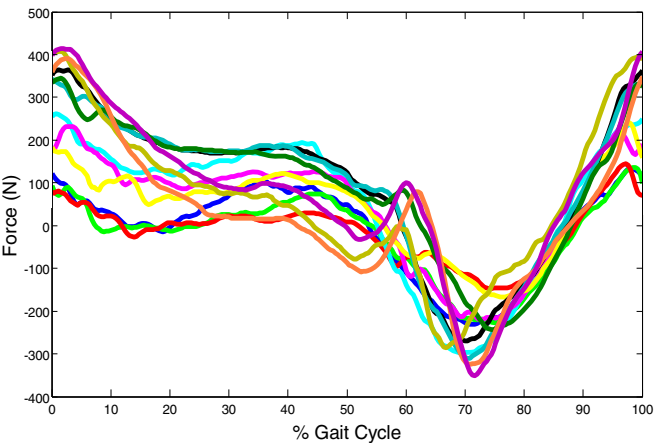

- 20% G.F. 1.5 Km/h
- 20% G.F. 2.0 Km/h
- 20% G.F. 2.5 Km/h
- 40% G.F. 1.5 Km/h
- 40% G.F. 2.0 Km/h
- 40% G.F. 2.5 Km/h
- 70% G.F. 1.5 Km/h
- 70% G.F. 2.0 Km/h
- 70% G.F. 2.5 Km/h
- 100% G.F. 1.5 Km/h
- 100% G.F. 2.0 Km/h
- 100% G.F. 2.5 Km/h
